# Supplementary material
Source: PubMed Central journal article supplement (PMC3379618)
Supplement: mmc1.pdf [file mmc1.pdf]

# Hydration changes upon DNA folding studied by osmotic stress experiments

*Shu-ichi Nakano, Daisuke Yamaguchi, Hisae Tateishi-Karimata, Daisuke Miyoshi, and Naoki Sugimoto*

*Faculty of Frontiers of Innovative Research in Science and Technology (FIRST) and Frontier Institute for Biomolecular Engineering Research (FIBER), Konan University, 7-1-20, Minatojima-minamimachi, Chuo-ku, Kobe, 650-0047, Japan*

## SUPPLEMENTARY MATERIALS

**TABLE S1 Thermodynamic parameters for the hairpin formations of 1a and 1b in the absence and presence of the 20 wt% cosolute<sup>a</sup>**

| Cosolute | 1a                                             |                                                |                                                               | 1b                                             |                                                |                                                               |
|----------|------------------------------------------------|------------------------------------------------|---------------------------------------------------------------|------------------------------------------------|------------------------------------------------|---------------------------------------------------------------|
|          | $-\Delta G^\circ$<br>(kcal mol <sup>-1</sup> ) | $-\Delta H^\circ$<br>(kcal mol <sup>-1</sup> ) | $-\Delta S^\circ$<br>(cal mol <sup>-1</sup> K <sup>-1</sup> ) | $-\Delta G^\circ$<br>(kcal mol <sup>-1</sup> ) | $-\Delta H^\circ$<br>(kcal mol <sup>-1</sup> ) | $-\Delta S^\circ$<br>(cal mol <sup>-1</sup> K <sup>-1</sup> ) |
| None     | 1.72±0.01                                      | 34.5±3.9                                       | 110±14                                                        | 1.76±0.02                                      | 36.8±2.2                                       | 113±7                                                         |
| Dex70    | 1.66±0.01                                      | 36.0±0.6                                       | 111±2                                                         | 1.61±0.04                                      | 34.2±0.2                                       | 105±1                                                         |
| Dex10    | 1.85±0.02                                      | 34.7±0.8                                       | 106±3                                                         | 1.77±0.06                                      | 34.7±0.8                                       | 106±3                                                         |
| Ficoll   | 1.68±0.10                                      | 34.7±1.6                                       | 106±5                                                         | 1.59±0.03                                      | 33.5±1.2                                       | 103±4                                                         |
| PEG8000  | 1.72±0.08                                      | 33.0±0.2                                       | 105±7                                                         | 1.76±0.05                                      | 34.1±3.0                                       | 104±9                                                         |
| PEG200   | 0.992±0.065                                    | 32.5±1.1                                       | 102±3                                                         | 0.937±0.020                                    | 33.5±2.8                                       | 105±9                                                         |
| EG       | 1.03±0.05                                      | 34.6±1.3                                       | 108±4                                                         | 0.938±0.020                                    | 34.1±0.4                                       | 107±1                                                         |
| Glyc     | 1.31±0.05                                      | 34.4±1.6                                       | 107±5                                                         | 1.27±0.04                                      | 35.9±0.8                                       | 112±3                                                         |
| PDO      | 0.961±0.024                                    | 33.5±0.1                                       | 104±2                                                         | 0.899±0.087                                    | 33.5±0.4                                       | 105±1                                                         |
| MME      | 0.699±0.070                                    | 35.8±3.1                                       | 113±10                                                        | 0.622±0.002                                    | 36.4±1.8                                       | 115±6                                                         |
| DME      | 0.582±0.015                                    | 41.3±2.4                                       | 131±8                                                         | 0.520±0.044                                    | 39.0±0.9                                       | 124±3                                                         |
| MeOH     | 0.717±0.047                                    | 36.0±2.3                                       | 114±7                                                         | 0.772±0.053                                    | 34.5±2.9                                       | 109±9                                                         |
| EtOH     | 0.550±0.056                                    | 34.5±0.2                                       | 109±1                                                         | 0.476±0.010                                    | 33.9±4.4                                       | 108±15                                                        |
| PrOH     | 0.167±0.086                                    | 32.7±3.6                                       | 105±12                                                        | 0.069±0.039                                    | 31.6±5.0                                       | 102±16                                                        |

<sup>a</sup> The values were determined from the curve fit calculation, and the  $\Delta G^\circ$  was calculated at 37°C. The error value was determined from the data obtained at the 50 and 2  $\mu$ M concentrations, except for the data of PEG8000 that was obtained at 10 and 2  $\mu$ M due to its limited solubility.

**TABLE S2 Thermodynamic parameters for the hairpin formations of 2a and 2b in the absence and presence of the 20 wt% cosolute<sup>a</sup>**

| Cosolute | <b>2a</b>                                      |                                                |                                                               | <b>2b</b>                                      |                                                |                                                               |
|----------|------------------------------------------------|------------------------------------------------|---------------------------------------------------------------|------------------------------------------------|------------------------------------------------|---------------------------------------------------------------|
|          | $-\Delta G^\circ$<br>(kcal mol <sup>-1</sup> ) | $-\Delta H^\circ$<br>(kcal mol <sup>-1</sup> ) | $-\Delta S^\circ$<br>(cal mol <sup>-1</sup> K <sup>-1</sup> ) | $-\Delta G^\circ$<br>(kcal mol <sup>-1</sup> ) | $-\Delta H^\circ$<br>(kcal mol <sup>-1</sup> ) | $-\Delta S^\circ$<br>(cal mol <sup>-1</sup> K <sup>-1</sup> ) |
| None     | 1.87±0.03                                      | 35.9±0.01                                      | 110±1                                                         | 1.94±0.09                                      | 38.1±1.8                                       | 116±6                                                         |
| Dex70    | 1.87±0.08                                      | 40.4±0.8                                       | 124±2                                                         | 1.98±0.08                                      | 39.9±1.6                                       | 122±5                                                         |
| Dex10    | 1.91±0.07                                      | 35.6±0.1                                       | 109±1                                                         | 1.95±0.07                                      | 38.2±0.1                                       | 117±1                                                         |
| Ficoll   | 1.93±0.01                                      | 39.6±0.5                                       | 121±2                                                         | 1.95±0.04                                      | 41.3±2.6                                       | 127±9                                                         |
| PEG8000  | 1.85±0.04                                      | 37.0±0.4                                       | 113±1                                                         | 1.88±0.04                                      | 39.3±2.8                                       | 121±9                                                         |
| PEG200   | 1.05±0.08                                      | 39.6±0.1                                       | 124±1                                                         | 1.10±0.09                                      | 40.4±0.6                                       | 127±2                                                         |
| EG       | 1.17±0.03                                      | 40.3±0.2                                       | 126±1                                                         | 1.16±0.01                                      | 42.1±1.0                                       | 132±3                                                         |
| Glyc     | 1.39±0.03                                      | 38.9±0.1                                       | 121±1                                                         | 1.32±0.03                                      | 39.2±1.1                                       | 122±3                                                         |
| PDO      | 1.03±0.05                                      | 38.5±2.9                                       | 121±9                                                         | 0.982±0.033                                    | 39.1±0.3                                       | 123±1                                                         |
| MME      | 0.562±0.031                                    | 39.2±3.0                                       | 125±9                                                         | 0.597±0.041                                    | 40.1±1.2                                       | 127±4                                                         |
| DME      | 0.381±0.004                                    | 42.5±2.6                                       | 136±8                                                         | 0.358±0.051                                    | 40.9±0.7                                       | 131±2                                                         |
| MeOH     | 0.786±0.057                                    | 40.0±2.8                                       | 126±9                                                         | 0.783±0.020                                    | 42.6±1.4                                       | 135±4                                                         |
| EtOH     | 0.257±0.029                                    | 39.0±0.6                                       | 125±2                                                         | 0.221±0.013                                    | 42.3±0.4                                       | 136±1                                                         |
| PrOH     | -0.125±0.034                                   | 40.7±0.4                                       | 132±1                                                         | -0.108±0.094                                   | 41.5±2.6                                       | 134±8                                                         |

<sup>a</sup> The values were determined from the curve fit calculation, and the  $\Delta G^\circ$  was calculated at 37°C. The error value was determined from the data obtained at the 50 and 2  $\mu$ M concentrations, except for the data of PEG8000 that was obtained at 10 and 2  $\mu$ M due to its limited solubility.

**TABLE S3** Thermodynamic parameters for the formation of the double-stranded duplexes of the AT-rich **9a** and **9b** at 0~30 wt% PEG<sup>a</sup>

| PEG wt% | <b>9a</b>                                      |                                                |                                                               | <b>9b</b>                                      |                                                |                                                               |
|---------|------------------------------------------------|------------------------------------------------|---------------------------------------------------------------|------------------------------------------------|------------------------------------------------|---------------------------------------------------------------|
|         | $-\Delta G^\circ$<br>(kcal mol <sup>-1</sup> ) | $-\Delta H^\circ$<br>(kcal mol <sup>-1</sup> ) | $-\Delta S^\circ$<br>(cal mol <sup>-1</sup> K <sup>-1</sup> ) | $-\Delta G^\circ$<br>(kcal mol <sup>-1</sup> ) | $-\Delta H^\circ$<br>(kcal mol <sup>-1</sup> ) | $-\Delta S^\circ$<br>(cal mol <sup>-1</sup> K <sup>-1</sup> ) |
| 0       | 5.26±0.22                                      | 55.5±2.0                                       | 162±3                                                         | 4.98±0.29                                      | 54.6±2.1                                       | 160±6                                                         |
| 10      | 4.78±0.33                                      | 54.4±2.3                                       | 160±7                                                         | 4.69±0.36                                      | 50.9±2.5                                       | 149±8                                                         |
| 20      | 4.38±0.20                                      | 54.0±1.5                                       | 160±4                                                         | 4.39±0.33                                      | 50.6±2.4                                       | 149±7                                                         |
| 25      | 4.18±0.19                                      | 53.8±1.4                                       | 160±4                                                         | 3.99±0.31                                      | 50.2±2.2                                       | 149±7                                                         |
| 30      | 3.63±0.25                                      | 54.8±1.8                                       | 165±6                                                         | 3.51±0.30                                      | 49.1±2.0                                       | 147±7                                                         |

<sup>a</sup> The values were determined from the curve fit calculation and the  $T_m^{-1}$  versus  $\log(C_t)$  plot. The  $\Delta G^\circ$  was calculated at 37°C. The relatively low duplex stability limited the measurement using PEG up to 30 wt%.

**TABLE S4** Thermodynamic parameters for the formation of double-stranded duplexes of the GC-rich **10a** and **10b** at 0~40 wt% PEG<sup>a</sup>

| PEG wt% | <b>10a</b>                                     |                                                |                                                               | <b>10b</b>                                     |                                                |                                                               |
|---------|------------------------------------------------|------------------------------------------------|---------------------------------------------------------------|------------------------------------------------|------------------------------------------------|---------------------------------------------------------------|
|         | $-\Delta G^\circ$<br>(kcal mol <sup>-1</sup> ) | $-\Delta H^\circ$<br>(kcal mol <sup>-1</sup> ) | $-\Delta S^\circ$<br>(cal mol <sup>-1</sup> K <sup>-1</sup> ) | $-\Delta G^\circ$<br>(kcal mol <sup>-1</sup> ) | $-\Delta H^\circ$<br>(kcal mol <sup>-1</sup> ) | $-\Delta S^\circ$<br>(cal mol <sup>-1</sup> K <sup>-1</sup> ) |
| 0       | 12.3±0.4                                       | 68.1±3.0                                       | 180±9                                                         | 11.7±0.1                                       | 67.5±1.1                                       | 180±3                                                         |
| 10      | 11.7±0.2                                       | 67.2±1.7                                       | 179±5                                                         | 11.1±0.2                                       | 65.7±1.5                                       | 176±4                                                         |
| 20      | 11.1±0.4                                       | 64.4±3.2                                       | 172±10                                                        | 10.3±0.3                                       | 65.5±2.4                                       | 178±7                                                         |
| 30      | 9.96±0.62                                      | 63.0±4.8                                       | 171±13                                                        | 9.41±0.42                                      | 64.0±3.0                                       | 176±9                                                         |
| 40      | 8.68±0.30                                      | 61.1±2.2                                       | 169±7                                                         | 8.36±0.18                                      | 61.4±1.3                                       | 171±4                                                         |

<sup>a</sup> The values were determined from the curve fit calculation and the  $T_m^{-1}$  versus  $\log(C_t)$  plot. The  $\Delta G^\circ$  was calculated at 37°C.

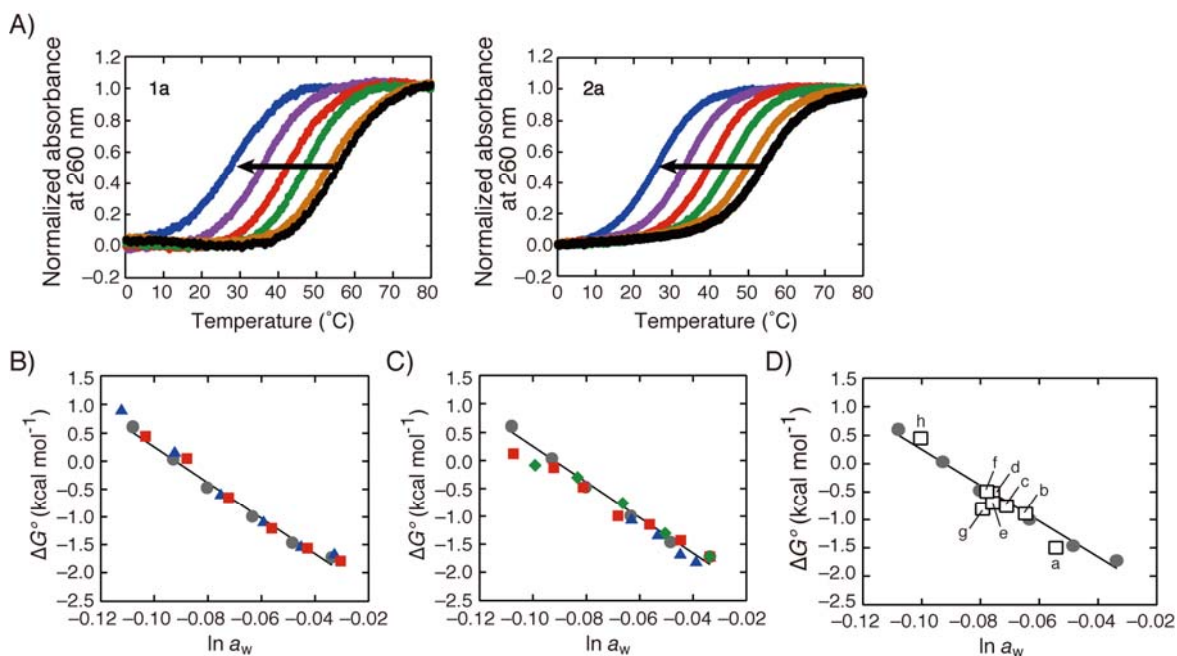

**FIGURE S1.** (A) UV melting curves of **1a** (left) and **2a** (right) at 2  $\mu\text{M}$  concentration in the absence and presence of PEG200. The melting temperatures are 54.3, 53.1, 47.2, 42.6, 35.9, and 30.0  $^{\circ}\text{C}$  for **1a** and 54.7, 50.6, 46.6, 40.2, 34.0, and 27.0 $^{\circ}\text{C}$  for **2a** when increasing the amount of PEG from 0 to 50 wt%, indicated by arrow. (B) The plots for **1a** against the logarithm of the water activity, obtained using the PEG200 solutions containing NaCl (circles), KCl (triangles) or CsCl (squares) at 1 M. (C) The plots for **1a** against the logarithm of the water activity, obtained using the 1 M NaCl solutions of 10~50 wt% PEG200 (circles), 5~20 wt% PEG8000 (triangles), 5~30 wt% dimethoxyethane (squares), or 5~20 wt% 1-propanol (diamonds). (D) The plots for **1a** obtained using the binary mixture solutions of (a) 10 % PEG200/10 % PEG8000, (b) 10 % PEG200/10 % DME, (c) 1 M DME/1 M PrOH, (d) 10 % PEG200/10 % PrOH, (e) 1 M PEG200/1 M DME, (f) 1 M PEG200/1 M PrOH, (g) 20 % PEG200/20 % PEG8000, and (h) 20 wt% PEG200/20 wt% DME, in comparison to the data of 0~50 wt% PEG200 (circles).

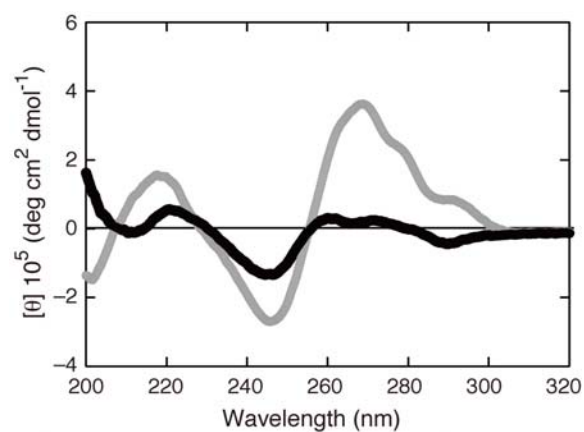

**FIGURE S2.** Circular dichroism (CD) spectra of the DNA duplexes containing the 5'-pyrimidine-GA-purine-3' (gray) and 5'-purine-GA-pyrimidine-3' sequences (black) shown in Fig. 2C. The spectra were measured with 40  $\mu$ M in the 1 M NaCl-phosphate buffer.

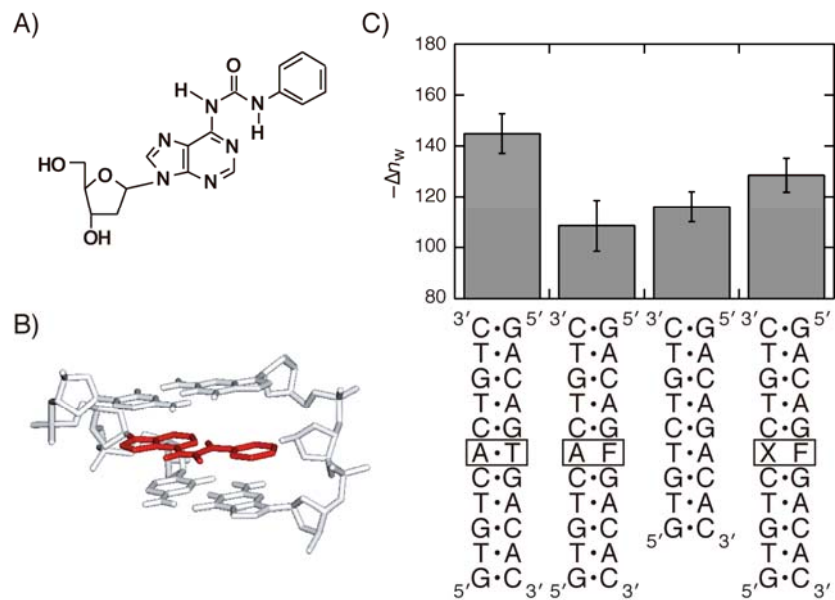

**FIGURE S3.** (A) Structure of  $A^{phe}$  (*N*6-(*N'*-phenylcarbamoyl)-2'-deoxyadenosine) as an A/T base-pair analog. (B) The stacking model of  $A^{phe}$  (colored in red) opposite the tetrahydrofuran abasic site in a DNA duplex. (C) The values of  $\Delta n_w$  for the 11-mer duplexes having different base pairs in the middle and that for the 9-mer duplex without the trinucleotide interactions in the middle of the 11-mer duplex. F and X indicate the tetrahydrofuran abasic site and  $A^{phe}$ , respectively.

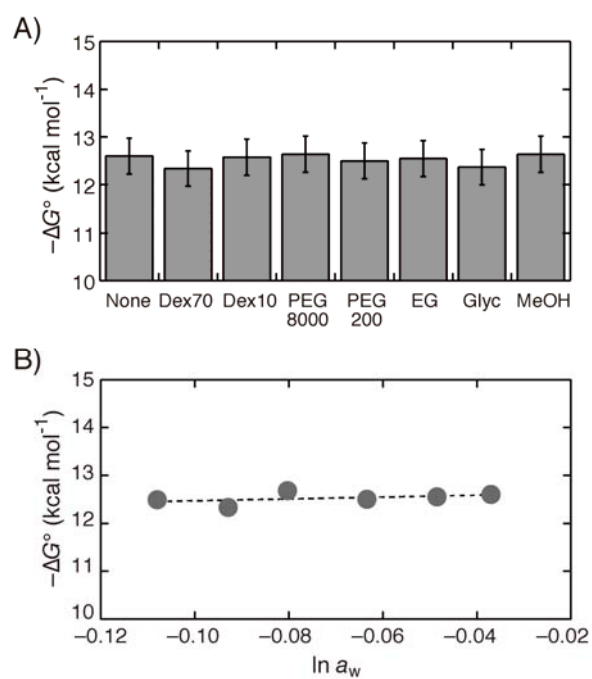

**FIGURE S4.** (A) The self-complementary PNA sequence and the plot of  $\Delta G^\circ$  versus  $\ln a_w$  for the PNA duplex. (B) The  $\Delta G^\circ$  of the duplex formed by the self-complementary PNA sequence <sup>N</sup>ATGCGCAT<sup>C</sup> obtained in various solutions containing cosolutes at 20 wt%.



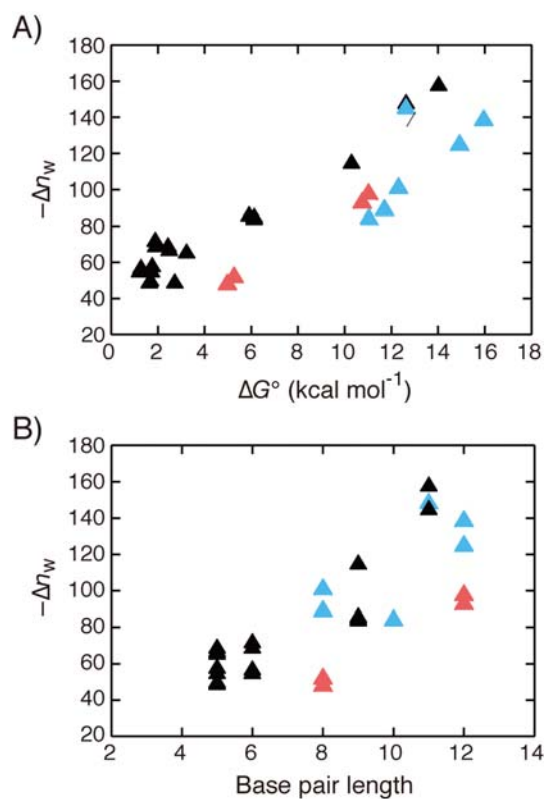

**FIGURE S5.** (A) The plot of  $-\Delta n_w$  versus the thermodynamic stability and (B) the plot of  $-\Delta n_w$  versus the length of the Watson-Crick base pairs of the oligonucleotide duplexes examined in this study. The colored symbols represent the data for biased sequences of continuous A/T (red) or G/C base pairs (blue) longer than 4.
